# Supplementary material
Source: PubMed Central journal article supplement (PMC10373026)
Supplement: jmcp.2022.28.3.316_S001.pdf [file jmcp.2022.28.3.316_S001.pdf]

## **SUPPLEMENTARY MATERIALS**

### **Clinical and economic impact of primary hyperoxaluria: a retrospective claims analysis**

Lisa Mucha, PhD; Bernd Hoppe, MD; Abigail Silber, MPH; Zheng Wang, BA; Gavin Miyasato, MS; Jeffrey R Skaar, PhD; and Craig Langman, MD

### **Supplementary Table 1. ICD-9-CM and ICD-10-CM Diagnostic Codes**

### **Supplementary Table 2. Prevalence of Individual Comorbidities From the Charlson Comorbidity Index**

**Supplementary Table 1. ICD-9-CM and ICD-10-CM Diagnostic Codes**

| Diagnosis Code | Diagnosis Code Type | Diagnosis Code Description                                         |
|----------------|---------------------|--------------------------------------------------------------------|
| 271.8          | ICD-9-CM            | Other specified disorders of carbohydrate transport and metabolism |
| E72.53         | ICD-10-CM           | Primary hyperoxaluria                                              |
| N20            | ICD-10-CM           | Calculus of kidney and ureter                                      |
| N20.0          | ICD-10-CM           | Calculus of kidney                                                 |
| N20.1          | ICD-10-CM           | Calculus of ureter                                                 |
| N20.2          | ICD-10-CM           | Calculus of kidney with calculus of ureter                         |
| N20.9          | ICD-10-CM           | Urinary calculus, unspecified                                      |
| N21            | ICD-10-CM           | Calculus of lower urinary tract                                    |
| N21.0          | ICD-10-CM           | Calculus in bladder                                                |
| N21.1          | ICD-10-CM           | Calculus in urethra                                                |
| N21.8          | ICD-10-CM           | Other lower urinary tract calculus                                 |
| N21.9          | ICD-10-CM           | Calculus of lower urinary tract, unspecified                       |
| N22            | ICD-10-CM           | Calculus of urinary tract in diseases classified elsewhere         |
| R82.992        | ICD-10-CM           | Hyperoxaluria                                                      |

*ICD-9/10-CM=International Classification of Diseases 9<sup>th</sup>/10<sup>th</sup> Revision, Clinical Modification.*

**Supplementary Table 2. Prevalence of Individual Comorbidities From the Charlson Comorbidity Index**

| Occurrence of Each Comorbidity in the Charlson Comorbidity Index |       |           |                 |
|------------------------------------------------------------------|-------|-----------|-----------------|
|                                                                  | PH, % | Non-PH, % | <i>P</i> -Value |
| Myocardial infarction                                            | 2.2   | 0.9       | 0.032           |
| Congestive heart failure                                         | 2.8   | 1.5       | 0.122           |
| Peripheral vascular disease                                      | 5.2   | 2.0       | <0.001          |
| Cerebrovascular disease                                          | 4.3   | 1.4       | <0.001          |
| Dementia                                                         | 0.6   | 0.1       | 0.073           |
| Chronic pulmonary disease                                        | 10    | 8.0       | 0.116           |
| Connective tissue (rheumatic) disease                            | 2.5   | 1.2       | 0.069           |
| Peptic ulcer disease                                             | 0.9   | 0.4       | 0.130           |
| Mild liver disease                                               | 9.9   | 3.5       | <0.001          |
| Diabetes without chronic complications                           | 18    | 10        | <0.001          |
| Hemiplegia or paraplegia                                         | 2.2   | 0.2       | <0.001          |
| Moderate or severe renal disease                                 | 10    | 1.3       | <0.001          |
| Diabetes with chronic complications                              | 3.7   | 3.1       | 0.564           |
| Moderate or severe liver disease                                 | 0.6   | 0.1       | 0.069           |
| Metastatic solid tumor                                           | 0.3   | 0.6       | 0.571           |
| AIDS (not just HIV positive)                                     | 0.6   | 0.3       | 0.235           |
| Any malignancy, including leukemia and lymphoma                  | 7.1   | 4.1       | 0.017           |
